1 Relationships between estimated autozygosity and complex traits in the UK Biobank

2

3 Emma C Johnson<sup>1\*</sup>, Luke M Evans<sup>2</sup>, Matthew C Keller<sup>2,3</sup>

4

5

6 <sup>1</sup>Department of Psychiatry, Washington University School of Medicine, St. Louis, MO,

7 United States of America

8 <sup>2</sup>Institute for Behavioral Genetics, University of Colorado Boulder, Boulder, Colorado,

9 United States of America

10 <sup>3</sup>Department of Psychology and Neuroscience, University of Colorado Boulder, Boulder,

11 Colorado, United States of America

12

13 \* Corresponding author

14 Email: [emma.c.johnson@wustl.edu](mailto:emma.c.johnson@wustl.edu)

15

16

17

18

19

20

21

22

23

24

25

26

27

28 **Abstract**

29 Inbreeding increases the risk of certain Mendelian disorders in humans but may  
30 also reduce fitness through its effects on complex traits and diseases. Such inbreeding  
31 depression is thought to occur due to increased homozygosity at causal variants that are  
32 recessive with respect to fitness. Until recently it has been difficult to amass large  
33 enough sample sizes to investigate the effects of inbreeding depression on complex  
34 traits using genome-wide single nucleotide polymorphism (SNP) data in population-  
35 based samples. Further, it is difficult to infer causation in analyses that relate degree of  
36 inbreeding to complex traits because confounding variables (e.g., education) may  
37 influence both the likelihood for parents to outbreed and offspring trait values. The  
38 present study used runs of homozygosity in genome-wide SNP data in up to 400,000  
39 individuals in the UK Biobank to estimate the proportion of the autosome that exists in  
40 autozygous tracts—stretches of the genome which are identical due to a shared  
41 common ancestor. After multiple testing corrections and controlling for possible  
42 sociodemographic confounders, we found significant relationships in the predicted  
43 direction between estimated autozygosity and three of the 26 traits we investigated: age  
44 at first sexual intercourse, fluid intelligence, and forced expiratory volume in 1 second.  
45 Our findings for fluid intelligence and forced expiratory volume corroborate those of  
46 several published studies while the finding for age at first sexual intercourse was novel.  
47 These results may suggest that these traits have been associated with Darwinian fitness  
48 over evolutionary time, although there are other possible explanations for these  
49 associations that cannot be eliminated. Some of the autozygosity-trait relationships were  
50 attenuated after controlling for background sociodemographic characteristics, suggesting  
51 that care needs to be taken in the design and interpretation of ROH studies in order to  
52 glean reliable information about the genetic architecture and evolutionary history of  
53 complex traits.

54

## 55 **Author Summary**

56 Inbreeding is well known to increase the risk of rare, monogenic diseases, and there has  
57 been some evidence that it also affects complex traits, such as cognition and  
58 educational attainment. However, difficulties can arise when inferring causation in these  
59 types of analyses because of the potential for confounding variables (e.g.,  
60 socioeconomic status) to bias the observed relationships between distant inbreeding and  
61 complex traits. In this investigation, we used single-nucleotide polymorphism data in a  
62 very large ( $N > 400,000$ ) sample of seemingly outbred individuals to quantify the degree  
63 to which distant inbreeding is associated with 26 complex traits. We found robust  
64 evidence that distant inbreeding is inversely associated with fluid intelligence and a  
65 measure of lung function, and is positively associated with age at first sex, while other  
66 trait associations with inbreeding were attenuated after controlling for background  
67 sociodemographic characteristics. Our findings are consistent with evolutionary  
68 predictions that fluid intelligence, lung function, and age at first sex have been under  
69 selection pressures over time; however, they also suggest that confounding variables  
70 must be accounted for in order to reliably interpret results from these types of analyses.

71

## 72 **Introduction**

73 Inbreeding occurs when genetic relatives have offspring, and is associated with  
74 increased risk of disorders and decreased health and viability in offspring (1–3). This  
75 effect, called inbreeding depression, is thought to occur because natural selection more  
76 efficiently removes additive and dominant deleterious alleles, leaving the remaining  
77 deleterious alleles segregating in the population at a given time more recessive than  
78 otherwise expected (4), a phenomenon called directional dominance. Inbreeding is  
79 thought to be associated with lower fitness because it leads to long stretches of the

80 genome that are autozygous—homozygous because the genomic segments inherited  
81 from each parent are from the same ancestor. Autozygosity reveals the full deleterious  
82 effects of recessive or partially recessive alleles that exist in these regions, and so  
83 individuals with increased autozygosity are more likely to exhibit deficits in traits that  
84 have been associated with Darwinian fitness over evolutionary time. Thus, one major  
85 reason for the interest in studying the effects of inbreeding on complex traits has been  
86 that such studies can provide insight into which traits have been under natural selection.

87         Because all humans are related to one another, even if distantly, inbreeding is a  
88 matter of degree. In the last decade, the increasing availability of genome-wide single  
89 nucleotide polymorphism (SNP) data has allowed scientists to infer degree of distant  
90 inbreeding, or the proportion of the genome that is autozygous, using runs of  
91 homozygosity (ROHs)—long stretches of SNPs that are homozygous (5). The total  
92 proportion of the genome contained within these homozygous regions is called  $F_{ROH}$  and  
93 has been shown to be the best genome-wide estimate of autozygosity (5,6). However,  
94 very large samples (e.g.  $n > 10,000$ ) are required to detect likely effects of  $F_{ROH}$  in  
95 outbred human populations because of the low variance in levels of genome-wide  
96 autozygosity in such populations. Previous studies of  $F_{ROH}$  in humans have found  
97 evidence consistent with inbreeding depression for several complex traits, including  
98 height, forced expiratory volume in one second (FEV1), educational attainment, and  
99 cognitive ability ( $g$ ) (7–9), with less conclusive evidence for an effect of inbreeding on  
100 psychiatric disorders (10,11) or risk factors for late-onset diseases like hypertension and  
101 other cardiovascular disease (12,13). These observed associations with  $F_{ROH}$  may  
102 suggest that directional selection has acted on these traits ancestrally.

103         One challenge in autozygosity research in humans is in the causal interpretations  
104 of any observed  $F_{ROH}$ -trait relationships. It is likely that propensity to outbreed (choosing  
105 mates who are genetically dissimilar) is related to multiple sociodemographic variables,

106 such as education, religiosity, or socioeconomic status, that may also influence offspring  
107 trait values. In a recent study conducted in the Netherlands, a relatively small, densely  
108 populated country with a strong history of latitudinal religious assortment, Abdellaoui et  
109 al. (14) found a significant association between decreased  $F_{ROH}$  (i.e. less inbred) and  
110 increased risk for major depressive disorder (MDD); this counter-intuitive association  
111 disappeared when the models accounted for religious assortment. This suggests that the  
112 original  $F_{ROH}$ -MDD association occurred for sociological rather than genetic reasons:  
113 religious individuals had higher average levels of autozygosity than non-religious  
114 individuals, probably due to denominational restrictions on mate choice that were only  
115 recently relaxed (14), and religious individuals were less likely to experience MDD (15).  
116 In another recent study, the largest ( $N > 300,000$ )  $F_{ROH}$  analysis to date, Joshi et al.  
117 (2016) found a significant relationship between  $F_{ROH}$  and four complex traits: height,  
118 FEV1, cognitive ability ( $g$ ), and educational attainment (7). When educational attainment  
119 was included as a covariate in the model as a proxy for SES, the effects for height,  
120 FEV1, and cognitive ability remained significant. Because of the persistence of these  
121 effects after accounting for educational attainment, the authors conclude that the  
122 relationship they observed between  $F_{ROH}$  and the complex traits is likely a due to a  
123 genetic mechanism, directional dominance, rather than to sociodemographic confounds.  
124 However, the  $F_{ROH}$ -trait effect sizes decreased by ~20-35% after controlling for SES; it is  
125 possible that inclusion of additional, or more relevant, sociodemographic covariates  
126 could have changed these conclusions.

127         The findings from our work and others on the relationship between  $F_{ROH}$  and  
128 psychiatric disorders in ascertained samples (10,11,16–20) have been inconsistent and  
129 highlight concerns about the potential for unmeasured confounders to influence  $F_{ROH}$   
130 results. Using the Psychiatric Genomics Consortium (PGC) MDD data from 9 samples,  
131 Power et al.(11) found a significant positive relationship between  $F_{ROH}$  and MDD in three

132 German samples but, strangely, a significant negative relationship between  $F_{ROH}$  and  
133 MDD in six samples from non-German sites. Similarly, in 2012 we found a small but  
134 highly significant association between schizophrenia and  $F_{ROH}$  across 17 case-control  
135 datasets (total  $N = 21,844$  (19)). However, in 2016 we published an independent  
136 replication using the same procedures as our previous study that found little to no  
137 evidence of an  $F_{ROH}$ -schizophrenia association across 22 case-control datasets (total  $N$   
138  $= 39,830$  (10)). We are uncertain how to explain these discrepancies, but we have  
139 hypothesized that unmeasured confounding variables such as education, religiosity, and  
140 income can differentially bias such ROH findings across different sites, and that this  
141 problem is particularly salient in ascertained samples where cases and controls may be  
142 drawn from population that differ slightly on background sociodemographic  
143 characteristics. While such differences in ascertainment between cases and controls are  
144 unlikely to lead to significant allele frequency differences, and thus are unlikely to bias  
145 genome-wide association studies (GWAS), they could very easily lead to systematic  
146 case-control differences in  $F_{ROH}$ , depending on the difference in degree of inbreeding in  
147 the populations from which cases and controls were drawn.

148 Here, we describe the most powerful investigation to date of the association of  
149  $F_{ROH}$  with complex traits. We used whole-genome SNP and phenotypic data from the UK  
150 Biobank (total  $n \sim 100,000 - 400,000$ ) to address two principal questions: (1) is there  
151 evidence consistent with directional dominance on traits related to fitness and health,  
152 such that increased  $F_{ROH}$  is associated with lower trait values? and (2) do  $F_{ROH}$ -trait  
153 relationships persist after controlling for multiple background sociodemographic  
154 variables? This sample is population-based, reducing concerns about ascertainment-  
155 induced confounds, and includes information on multiple relevant sociodemographic  
156 control variables and traits previously associated with  $F_{ROH}$  (e.g. waist-to-hip ratio, grip  
157 strength, diastolic and systolic blood pressure, and fluid intelligence (7–9,11–13)),

158 making it an ideal sample for investigating the relationship between distant inbreeding  
159 and complex traits.

160

## 161 **Methods**

### 162 **Ethics Statement**

163 This study utilized de-identified data from the UK Biobank. UK Biobank received  
164 ethical approval from the NHS National Research Ethics Service North West  
165 (11/NW/0382).

### 166 **UK Biobank Sample**

167 Our study utilized data from up to 400,000 individuals (*n* varied by phenotype)  
168 with genotypes available from the UK Biobank, a population based sample from the  
169 United Kingdom. 502,682 individuals were recruited from 2006-2010 from 22 centers  
170 across the UK. Participants were given a touchscreen interview that included questions  
171 about demographic characteristics, health history, and lifestyle information (e.g. diet,  
172 alcohol intake, sleep habits), and some anthropometric and physical measures were  
173 collected. DNA was extracted from whole blood and genotyped using either the  
174 Affymetrix UK Biobank Axiom array or the Affymetrix UK BiLEVE Axiom array. Detailed  
175 genotyping and sample QC procedures are described in Bycroft et al.(21)

### 176 **Phenotypes**

177 We examined 26 traits related to health, fitness, or sociodemographic  
178 characteristics (see Supplemental Materials for full description and field ID of individual  
179 measures). These included 17 continuous traits (age at first sexual intercourse, waist to  
180 hip ratio, height, body mass index (BMI), basal metabolic rate (BMR), diastolic and  
181 systolic blood pressure (BP), hand-grip strength (taking the maximum of left and right  
182 grip strength measurements), county-wide socioeconomic status (SES) as measured by  
183 the Townsend Deprivation Index (TDI), total household income (an ordinal variable of

184 income brackets recoded to be numeric, ranging from 0 - 4), years of educational  
185 attainment (coded using ISCED classifications as in Okbay et al. (22)), fluid intelligence  
186 (FI), forced expiratory volume in 1 second (FEV1; a measure of lung functioning), FEV1  
187 over forced vital capacity (FEV1/FVC), birth weight, neuroticism score, and body fat  
188 percentage) and 9 binary traits (ever smoked, ever drank alcohol, whether or not they  
189 were breastfed as a baby, whether or not they completed college, whether they specified  
190 participation in a religious group as a leisure activity, whether or not they had ever been  
191 diagnosed with diabetes, probable bipolar and/or major depression status, and whether  
192 or not they live in an urban or rural area). We excluded individuals who weighed less  
193 than 36.28 kg (~80 lbs), weighed more than 6.8 kg (~15 lbs) at birth, had systolic BP  
194 readings >200 mmHg or diastolic BP readings >120 mmHg, had a pulse <30 beats per  
195 minute or >130 beats per minute, were shorter than 120 cm (~3.93 ft), had a hip  
196 circumference <50 cm or >175 cm, had a waist circumference <40 cm or >160 cm, had  
197 grip strength >70 kg, or reported having had sex before 12 years of age. These  
198 exclusion criteria were chosen based on thresholds typically defined as being  
199 boundaries of normal physiological, anthropometric, or behavioral ranges and by  
200 checking for obvious outliers that may have been incorrect data entries. More  
201 information on specific phenotype derivations and calculations are included in the  
202 supplemental material. We standardized all quantitative phenotypes (within sex) before  
203 calculating their relationship with  $F_{ROH}$  for ease of comparison with Joshi et al.'s and  
204 others' results (7).

### 205 **Quality Control (QC) and ROH calling Procedures**

206 Because the sample was predominately European ancestry, we restricted  
207 analyses to individuals of European ancestry (n= 436,065) as identified by visual  
208 inspection of plots of genomic principle components. We followed sample and genotypic  
209 quality control that has become typical in ROH analyses. In particular, we excluded



210 SNPs if they a) deviated from Hardy-Weinberg equilibrium at  $p < 1 \times 10^{-6}$ , b) missingness  
211 proportion  $> 0.02$ , or c) had a minor allele frequency (MAF)  $< 0.05$ . We also excluded  
212 individuals with a missing genotype call rate  $> 0.02$ , and we removed the minimum  
213 number of individuals so that all remaining subjects were unrelated at  $\text{pihat} > 0.2$  (using  
214 GCTA's `--grm-cutoff` option (23)) ( $n = 31,541$  removed in total).

215       After QC, we pruned out SNPs that were in strong linkage disequilibrium with  
216 other SNPs by removing those that had a variance inflation factor  $> 10$  (equivalent to an  
217  $r^2$  of 0.90) between target SNPs and 50 surrounding SNPs (plink command: `--indep 50 5`  
218 `10`). After these procedures, 263,609 SNPs and 404,524 individuals remained. For our  
219 main analysis, we called ROHs as being  $\geq 65$  homozygous SNPs in a row spanning at  
220 least 1000 kb, with no heterozygote calls and one missing variant call allowed, per  
221 recommendations from Howrigan et al. (2011) for genotype data of similar SNP density.  
222 We required ROHs to have a density greater than at least 1 SNP per 200 kb (the  
223 average density across the genome in the SNPs used in the analysis was 1 per 10 kb),  
224 and split an ROH into two if a gap  $> 500$  kb existed between consecutive homozygous  
225 SNPs. All analyses used the `--homozyg` commands in Plink 1.9 (24). After calling ROHs,  
226 we summed the total length of all autosomal ROHs for each individual and divided that  
227 by the total SNP-mappable distance ( $2.77 \times 10^9$  bases) to calculate  $F_{ROH}$ , the proportion of  
228 the genome likely to be autozygous. In addition to calling ROHs, we also calculated a  
229 measure of SNP-by-SNP homozygosity ( $F_{SNP}$ ) for each individual, using the `--het` flag in  
230 Plink 1.9 (24):

$$231 \quad F_{SNP} = [\text{observed homozygous count} - \text{expected count}] / [\text{total observations} -$$
$$232 \quad \text{expected count}]$$

233 Because it is calculated with genotyped SNPs,  $F_{SNP}$  is a measure of excess  
234 homozygosity at common SNPs.

### 235 **ROH Burden Analysis**

236  $F_{ROH}$  was used as the primary predictor of the traits of interest in analyses  
237 described below. The distributions of ROH lengths and  $F_{ROH}$  are shown in Figure S1 (see  
238 Supplement). We regressed each trait ( $Y$ ) on  $F_{ROH}$  using the model in the equation  
239 below, where  $\hat{\beta}_0$  is the intercept,  $C$  is a matrix of covariates (including e.g. the first 20  
240 principle components) and  $\varepsilon$  represents the residual error term.

$$241 \quad Y = \hat{\beta}_0 + \hat{\beta}_1 F_{ROH} + \bar{Y}C + \varepsilon$$

242 As noted above, all quantitative phenotypes were standardized to intra-sex z-scores for  
243 ease of comparison with previous findings in the literature. In addition, for ease of  
244 interpretation, we reverse-coded some of the phenotypes such that lower values  
245 represented what we thought were likely to be lower fitness and/or less desirable  
246 outcomes (e.g. disease diagnosis was coded as '0' while no diagnosis as '1', and TDI  
247 was reverse-coded such that lower values represented greater material poverty). We  
248 were primarily interested in the estimate of  $\hat{\beta}_1$ , which represents the association of  $F_{ROH}$   
249 with the trait, controlling for covariates (although in one set of models, described below,  
250 we were also interested in the effect of  $F_{SNP}$  on the trait). For binary traits, we ran logistic  
251 regression models with the same covariates as in the linear regression models for  
252 quantitative traits.

253 We ran a total of three sets of models for each trait. The first set of models was  
254 designed to test for a simple relationship between  $F_{ROH}$  and the traits listed above.  
255 Because confounding factors such as population stratification, SNP missingness, call  
256 quality, and plate effects can influence  $F_{ROH}$ , we included the batch number, percentage  
257 of missing SNP calls per sample in the raw data, and the first 20 ancestry principal  
258 components (calculated within individuals of European ancestry), as well as age, age<sup>2</sup>,  
259 and sex, in all of the regression models unless explicitly stated.

260 In our second set of models, we tested whether background sociodemographic  
261 characteristics mediated  $F_{ROH}$ -trait relationships. In addition to the above covariates, in

262 these models we also included income, years of educational attainment, Townsend  
263 Deprivation Index (a measure of the amount of material deprivation in a given region),  
264 and whether subjects attended college, lived in an urban area, participated in a religious  
265 group as a leisure activity, and reported being breastfed as an infant. Although the  
266 covariates of true interest are those measured on the parents (whose sociodemographic  
267 traits may influence mate choice), parental information was unavailable (other than  
268 breastfeeding, which is associated with mother's socioeconomic status (25)), and so we  
269 used the subjects' own values on these traits as the best available proxies for  
270 characteristics of the their parents. To formally test whether the seven sociodemographic  
271 variables, in combination, significantly mediated the  $F_{ROH}$  associations identified in the  
272 first model, we followed Kenny and Judd's recommendations (26) for calculating the  
273 indirect effect size and then bootstrapped with 1,000 resamples to get the 99%  
274 confidence intervals around the indirect path coefficients for any significant  $F_{ROH}$ -trait  
275 associations we observed in our first set of models.

276 In our third set of models, we tested the degree to which observed  $F_{ROH}$ -trait  
277 relationships were due to homozygosity at common versus rare alleles. To do this, we  
278 included  $F_{SNP}$  as a covariate in addition to the covariates from the second set of models  
279 above. Because common SNPs can often predict (are in linkage disequilibrium with)  
280 other common SNPs but typically poorly predict rare SNPs,  $F_{SNP}$  captures effects of  
281 homozygosity at common SNPs only whereas  $F_{ROH}$  captures the effects of homozygosity  
282 at both common and rare SNPs (5). In the Supplement (Table S3), we demonstrate via  
283 simulation that entering both  $F_{SNP}$  and  $F_{ROH}$  as predictors simultaneously in the  
284 regression equation allows insight into the degree to which observed inbreeding effects  
285 are due to homozygosity at common versus rare alleles.

286

287 **Results**

288           The distribution of ROH lengths,  $F_{ROH}$ , and  $F_{SNP}$  are shown in Figures S1-S2, and  
289   descriptive statistics are given in Table S1. Using a Bonferroni correction based on  
290   testing 26 traits ( $\alpha = .002$ ), we observed significant negative associations between  
291    $F_{ROH}$  and grip strength, height, fluid intelligence score (FI), and forced expiratory volume  
292   in one second (FEV1), and observed significant positive associations between  $F_{ROH}$  and  
293   age at first sexual intercourse (AFS) and religious group participation (Table 1 and  
294   Figure 1). The associations we found between  $F_{ROH}$  and FI, FEV1, and height replicate  
295   three of Joshi et al.'s four significant findings. To our surprise, we did not replicate their  
296   significant relationship between  $F_{ROH}$  and educational attainment. As a post hoc analysis,  
297   we also tested the relative importance of recent vs. distant inbreeding by calculating  
298    $F_{ROH}$  from longer ROHs (indicative of closer inbreeding) and comparing to the effect of  
299    $F_{ROH}$  from shorter ROHs (a proxy for more distant inbreeding). We defined recent  
300   inbreeding as the proportion of the genome contained in autozygous regions longer than  
301   8.5 Mb ( $F_{ROH, recent}$ ) and distant inbreeding as the proportion of the genome in autozygous  
302   regions shorter than 8.5 Mb ( $F_{ROH, distant}$ ), as  $F_{ROH, recent}$  and  $F_{ROH, distant}$  had approximately  
303   equal variances ( $4.5e-6$  and  $4.3e-6$ , respectively) in our sample. An autozygous segment  
304   spanning  $< 8.5$  Mb should originate from a common ancestor at least 6 generations ago  
305   on average (27). Results for more recent inbreeding were similar to the full  $F_{ROH}$  models:  
306   income, grip strength, height, fluid intelligence score (FI), forced expiratory volume in  
307   one second (FEV1), age at first sexual intercourse (AFS), and religious group  
308   participation were all associated with  $F_{ROH, recent}$ , with the same direction of effect as the  
309   original models. Similarly, AFS, FEV1, FI, religious group attendance, and ever drink  
310   (such that being more autozygous was associated with a lower likelihood of having ever  
311   drank alcohol) were significantly associated with  $F_{ROH, distant}$ , while its associations with  
312   income, grip strength, and height were not (Table S4).  
313

314  
315  
316  
317  
318

**Table 1. Association of  $F_{ROH}$  with 26 traits, in two sets of models: 1) controlling for age, age<sup>2</sup>, sex, the first 20 principal components, sample missingness, and batch number as covariates, and 2) also controlling for sociodemographic variables.**

|                                                |                                                     |        | Main models - controlling for batch, sample missingness, sex, age, age <sup>2</sup> , and first 20 principle components |       |          | Models also controlling for sociodemographic covariates (income, educational attainment, college, urban, TDI, religiosity, whether or not breastfed) |       |          |
|------------------------------------------------|-----------------------------------------------------|--------|-------------------------------------------------------------------------------------------------------------------------|-------|----------|------------------------------------------------------------------------------------------------------------------------------------------------------|-------|----------|
| Category                                       | Trait                                               | df     | Beta                                                                                                                    | SE    | p        | Beta                                                                                                                                                 | SE    | p        |
| <b>Quantitative Traits (linear regression)</b> |                                                     |        |                                                                                                                         |       |          |                                                                                                                                                      |       |          |
| Sociodemographic                               | income                                              | 347753 | -1.648                                                                                                                  | 0.446 | 2.18E-04 |                                                                                                                                                      |       |          |
| Sociodemographic                               | years of education                                  | 400253 | -0.410                                                                                                                  | 0.429 | 0.340    |                                                                                                                                                      |       |          |
| Sociodemographic                               | Townsend Deprivation Index                          | 403904 | -0.590                                                                                                                  | 0.434 | 0.173    |                                                                                                                                                      |       |          |
| Biometric                                      | basal metabolic rate                                | 397233 | -0.922                                                                                                                  | 0.434 | 0.034    | -0.825                                                                                                                                               | 0.568 | 0.146    |
| Biometric                                      | birth weight                                        | 229424 | -0.925                                                                                                                  | 0.589 | 0.116    | -0.966                                                                                                                                               | 0.661 | 0.144    |
| Biometric                                      | body mass index                                     | 403043 | -0.469                                                                                                                  | 0.437 | 0.284    | -0.150                                                                                                                                               | 0.562 | 0.789    |
| Biometric                                      | body fat percentage                                 | 397018 | -0.539                                                                                                                  | 0.436 | 0.216    | -0.129                                                                                                                                               | 0.563 | 0.819    |
| Biometric                                      | diastolic BP                                        | 380556 | 0.864                                                                                                                   | 0.452 | 0.056    | 1.218                                                                                                                                                | 0.585 | 0.037    |
| Biometric                                      | systolic BP                                         | 379603 | 0.763                                                                                                                   | 0.432 | 0.077    | 0.398                                                                                                                                                | 0.551 | 0.470    |
| Biometric                                      | <b>forced expiratory volume in 1 second (FEV1)*</b> | 304171 | -2.677                                                                                                                  | 0.458 | 5.20E-09 | -2.791                                                                                                                                               | 0.580 | 1.51E-06 |
| Biometric                                      | FEV1/FVC                                            | 304171 | -0.584                                                                                                                  | 0.508 | 0.250    | 0.318                                                                                                                                                | 0.637 | 0.617    |
| Biometric                                      | height                                              | 403479 | -1.821                                                                                                                  | 0.427 | 1.99E-05 | -1.150                                                                                                                                               | 0.548 | 0.036    |

|                                              |                                         |        |        |       |          |        |       |          |
|----------------------------------------------|-----------------------------------------|--------|--------|-------|----------|--------|-------|----------|
| Biometric                                    | <b>grip strength</b>                    | 403459 | -1.706 | 0.420 | 4.81E-05 | -1.368 | 0.541 | 0.012    |
| Biometric                                    | waist to hip ratio                      | 403559 | -1.262 | 0.431 | 0.003    | -1.443 | 0.551 | 0.009    |
| Health- and fitness-related                  | <b>age at first sexual intercourse*</b> | 370726 | 4.355  | 0.474 | 3.97E-20 | 3.479  | 0.569 | 9.73E-10 |
| Health- and fitness-related                  | <b>fluid intelligence*</b>              | 130082 | -3.455 | 0.725 | 1.90E-06 | -3.414 | 0.847 | 5.58E-05 |
| Health- and fitness-related                  | neuroticism score                       | 327864 | 0.008  | 0.490 | 0.987    | 0.403  | 0.614 | 0.512    |
| <b>Binary Outcomes (logistic regression)</b> |                                         |        |        |       |          |        |       |          |
| Sociodemographic                             | breastfed as infant                     | 305774 | -1.974 | 1.177 | 0.093    |        |       |          |
| Sociodemographic                             | college degree                          | 404388 | -0.184 | 0.963 | 0.848    |        |       |          |
| Sociodemographic                             | live in urban area                      | 400499 | -1.525 | 1.190 | 0.200    |        |       |          |
| Sociodemographic                             | <b>religious group attendance</b>       | 404388 | 8.568  | 1.056 | 5.00E-16 |        |       |          |
| Health- and fitness-related                  | diagnosed with diabetes                 | 403257 | -3.486 | 1.808 | 0.054    | -3.580 | 2.406 | 0.137    |
| Health- and fitness-related                  | ever drink                              | 403860 | 5.720  | 2.026 | 0.005    | 2.840  | 2.950 | 0.336    |
| Health- and fitness-related                  | ever smoke                              | 365265 | 1.805  | 0.970 | 0.063    | 0.230  | 1.270 | 0.856    |
| Health- and fitness-related                  | BPD diagnosis                           | 70877  | 3.145  | 7.273 | 0.665    | 4.746  | 8.312 | 0.568    |
| Health- and fitness-related                  | MDD diagnosis                           | 95351  | 1.134  | 2.057 | 0.581    | -0.653 | 2.501 | 0.794    |

319  
320  
321  
322

Betas are reported for all quantitative traits, which were analyzed in within-sex standardized phenotypic units; the betas reported for binary traits and diagnoses are log odds ratios, as these outcomes were analyzed using logistic regression models. Phenotypes with

323 a significant relationship with  $F_{ROH}$  ( $p < 0.002$  after multiple testing correction) are bolded; those with an asterisk are also significantly  
324 associated with  $F_{ROH}$  after controlling for sociodemographic covariates (income, educational attainment, college degree, urbanicity,  
325 TDI, religious group participation, and whether or not they were breastfed as an infant). Sociodemographic variables are listed first,  
326 followed by biometric measures, with health- and fitness-related traits listed last. BP, blood pressure; FEV1, forced expiratory volume  
327 in 1 second; FVC, forced vital capacity; BPD, bipolar disorder; MDD, major depressive disorder; df, degrees of freedom; OR, odds  
328 ratio; SE, standard error.

329           When we included the seven sociodemographic variables as covariates in the  
330 regression models (other than those predicting sociodemographic variables), the betas  
331 associated with  $F_{ROH}$  decreased for AFS, grip strength, height, and FI (by 20.1%, 19.8%,  
332 36.8%, and 1.2%, respectively) and increased for FEV1 (by 4.2%) (see Table 1, Figure  
333 2). AFS, FI, and FEV1 remained significantly associated with  $F_{ROH}$  whereas the  
334 associations with height and grip strength became non-significant; no significant indirect  
335 mediation effect of the sociodemographic variables in combination was found (see  
336 Supplemental Materials for further discussion). Furthermore, the association between  
337  $F_{ROH,distant}$  and ever drink disappeared after controlling for the sociodemographic  
338 covariates, as did the associations between  $F_{ROH,recent}$  and grip strength, height, and FI  
339 (Table S5). Finally, we tested whether the effect of  $F_{ROH}$  differed by sex by including  
340  $sex * F_{ROH}$  interaction terms in each of the second set of models, but observed no  
341 significant sex-by- $F_{ROH}$  interactions for any of the traits.

342           In our final set of models, where excess SNP-by-SNP homozygosity ( $F_{SNP}$ ) was  
343 included as an additional covariate, AFS and FI remained significantly associated with  
344  $F_{ROH}$  after accounting for multiple testing and FEV1 was marginally significant (Table 2).  
345 Waist-to-hip ratio was significantly associated with  $F_{SNP}$  but not  $F_{ROH}$ , suggesting that  
346 higher homozygosity at common but not rare variants is related to increased waist-to-hip  
347 ratio.



348 **Table 2. Effects of both  $F_{ROH}$  and excess SNP-by-SNP homozygosity, measured by  $F_{SNP}$ , controlling for the covariates in the**  
 349 **previous models (age, sex, batch number, per-sample SNP missingness, the first 20 principal components, and background**  
 350 **sociodemographic variables.)**  
 351

| Model controlling for $F_{SNP}$ , batch, sample missingness, sex, age, age <sup>2</sup> , and first 20 principal components |                                             |               |             |            |               |             |            |
|-----------------------------------------------------------------------------------------------------------------------------|---------------------------------------------|---------------|-------------|------------|---------------|-------------|------------|
| Category                                                                                                                    | Trait                                       | $Beta_{FROH}$ | $SE_{FROH}$ | $p_{FROH}$ | $Beta_{FSNP}$ | $SE_{FSNP}$ | $p_{FSNP}$ |
| <b>Quantitative Traits (linear regression)</b>                                                                              |                                             |               |             |            |               |             |            |
| biometric                                                                                                                   | basal metabolic rate                        | -0.883        | 0.678       | 0.193      | 0.056         | 0.361       | 0.876      |
| biometric                                                                                                                   | birth weight                                | -1.443        | 0.792       | 0.069      | 0.465         | 0.426       | 0.275      |
| biometric                                                                                                                   | body mass index                             | -0.230        | 0.672       | 0.732      | 0.078         | 0.358       | 0.828      |
| biometric                                                                                                                   | body fat percentage                         | -0.353        | 0.672       | 0.599      | 0.219         | 0.357       | 0.540      |
| biometric                                                                                                                   | diastolic BP                                | 1.334         | 0.700       | 0.057      | -0.113        | 0.373       | 0.762      |
| biometric                                                                                                                   | systolic BP                                 | 0.725         | 0.658       | 0.271      | -0.318        | 0.351       | 0.365      |
| biometric                                                                                                                   | forced expiratory volume in 1 second (FEV1) | -2.010        | 0.688       | 0.0035     | -0.762        | 0.361       | 0.035      |
| biometric                                                                                                                   | FEV1/FVC                                    | -0.110        | 0.755       | 0.884      | 0.418         | 0.396       | 0.291      |
| biometric                                                                                                                   | height                                      | -0.950        | 0.655       | 0.147      | -0.195        | 0.349       | 0.576      |
| biometric                                                                                                                   | grip strength                               | -0.620        | 0.645       | 0.337      | -0.728        | 0.342       | 0.033      |
| biometric                                                                                                                   | <i>waist to hip ratio</i>                   | -0.137        | 0.658       | 0.835      | -1.273        | 0.351       | 2.88E-04   |
| health- and fitness-related                                                                                                 | <b>age at first sexual intercourse</b>      | 2.858         | 0.676       | 2.35E-05   | 0.602         | 0.354       | 0.089      |

|                                              |                           |        |        |       |        |       |       |
|----------------------------------------------|---------------------------|--------|--------|-------|--------|-------|-------|
| health- and fitness-related                  | <b>fluid intelligence</b> | -3.238 | 1.016  | 0.001 | -0.171 | 0.544 | 0.753 |
| health- and fitness-related                  | neuroticism score         | 0.432  | 0.732  | 0.555 | -0.029 | 0.389 | 0.941 |
| <b>Binary Outcomes (logistic regression)</b> |                           |        |        |       |        |       |       |
| health- and fitness-related                  | diagnosed with diabetes   | -3.840 | 3.051  | 0.208 | 0.252  | 1.812 | 0.890 |
| health- and fitness-related                  | ever drink                | 2.304  | 3.749  | 0.539 | 0.520  | 2.241 | 0.817 |
| health- and fitness-related                  | ever smoke                | -1.699 | 1.510  | 0.261 | 1.881  | 0.796 | 0.018 |
| health- and fitness-related                  | BPD diagnosis             | 7.619  | 10.645 | 0.474 | -2.864 | 6.632 | 0.666 |
| health- and fitness-related                  | MDD diagnosis             | -0.877 | 3.028  | 0.772 | 0.220  | 1.679 | 0.896 |

352

353 Phenotypes with a significant relationship with  $F_{ROH}$  ( $p < 0.003$  after multiple testing correction) are bolded, while those with a  
354 significant relationship with  $F_{SNP}$  are italicized. The quantitative traits (analyzed via linear regression) are listed first in the table,  
355 followed by diagnoses and binary traits. BP, blood pressure; FEV1, forced expiratory volume in 1 second; FVC, forced vital capacity;  
356 BPD, bipolar disorder; MDD, major depressive disorder; df, degrees of freedom; SE, standard error.

## 357 **Discussion**

### 358 Overview of findings

359 We replicated several previous associations between  $F_{ROH}$  and fitness-related  
360 traits, identified a novel association between  $F_{ROH}$  and a reproductive phenotype (age at  
361 first sexual intercourse), and found weak evidence that background sociodemographic  
362 characteristics may be partially mediating a few of the observed relationships between  
363  $F_{ROH}$  and complex traits (Figure 2). In particular, we found robust evidence that fluid  
364 intelligence (FI), forced expiratory volume in one second (FEV1), and age at first sexual  
365 intercourse (AFS) are associated with  $F_{ROH}$  (Tables 1 and 2), while grip strength and  
366 height's relationships with  $F_{ROH}$  were attenuated enough to become non-significant after  
367 controlling for background sociodemographic variables. The strength of  $F_{ROH}$   
368 associations for more recent inbreeding was similar or stronger than those for more  
369 distant inbreeding, except, interestingly, for participation in a religious group. When we  
370 accounted for SNP-by-SNP homozygosity in the model, AFS and FI were still  
371 significantly associated with  $F_{ROH}$ , consistent with their relationships with  $F_{ROH}$  being  
372 more strongly driven by homozygosity at rare rather than common variants. Certain  
373 other associations were likely due to social rather than genetic causes; for example, it is  
374 much more plausible that non-religious individuals tend to outbreed at higher rates and  
375 have less religious offspring than that autozygosity causes individuals to be more  
376 religious.

### 377 Comparison with previous results

378 Our results largely agree with recent reports (7–9) on the relationships between  
379 estimated autozygosity and complex traits in population-based samples. Replicating  
380 both Howrigan et al. (8) and Joshi et al. (7) as well as previous pedigree studies (28), we  
381 found a significant, negative relationship between  $F_{ROH}$  and fluid intelligence. In addition,  
382 we replicated Joshi et al.'s (7) finding of a significant relationship between increased

383  $F_{ROH}$  and decreased FEV1. We initially observed a significant association between  
384 increased  $F_{ROH}$  and decreased height, as did Joshi et al.(7) and Verweij et al.(9), but this  
385 association was attenuated in our sample after controlling for background  
386 sociodemographic variables and did not meet statistical significance after Bonferroni  
387 corrections (Table 1, Figure 2). Our initial results (Table 1) were consistent with previous  
388 findings for an effect of inbreeding depression on grip strength (9), though this  
389 association appears to be largely due to homozygosity at common rather than rare  
390 variants (Table 2).

391         Despite the general consistency across reports on  $F_{ROH}$ -complex trait  
392 associations, there were two differences between our results and those from earlier  
393 studies. First, educational attainment (in years of education) was not significantly  
394 associated with  $F_{ROH}$  in any of our models, contrary to previous reports (7,9). We found a  
395 suggestive ( $p = 2.18e-4$ ) relationship between  $F_{ROH}$  and income (which itself was  
396 correlated with years of education at  $r = 0.37$ ), but we found no evidence for an  
397 association between  $F_{ROH}$  and either years of education or the binary variable measuring  
398 whether or not an individual attended college. The reason for the discrepancy in findings  
399 for education is unlikely to be due to sampling variability because the two confidence  
400 intervals do not overlap (Figure 2). One possibility is that educational attainment is less  
401 correlated with geographic mobility (and the tendency to outbreed) in the UK compared  
402 to other countries previously investigated, and Joshi et al. (7) did report significant  
403 heterogeneity of the  $F_{ROH}$ -education association across sites. Moreover, of the 5 cohorts  
404 from the UK investigated by Joshi et al. (7), two (GRAPHIC and LBC1936) showed  
405 associations in the opposite direction of the overall association (see their Extended Data  
406 Figure 2). Thus, it is possible that the  $F_{ROH}$ -educational attainment relationship might be  
407 different in the UK than is typical in other societies. Furthermore, the association we  
408 found between height and autozygosity was attenuated (by ~37%) when we accounted

409 for sociodemographic covariates, and was somewhat smaller than that found by  
410 previous studies even when we did not control for sociodemographic variables (e.g. a  
411 1% increase in  $F_{ROH}$  predicted a decrease of  $\sim.03$  s.d. of height in previous studies (7,29)  
412 versus a decrease of  $\sim.02$  s.d. in the current study). Nevertheless, the confidence  
413 intervals for Joshi et al.'s (2015) and our observed association between height and  $F_{ROH}$   
414 overlapped (Figure 2), suggesting that sampling variability could be a reason for the  
415 discrepancy in height findings.

416 In comparing results across recent publications and the current one, it is  
417 important to note the differences in populations, samples, and measurements across  
418 studies. Both Howrigan et al. (8) and Joshi et al. (7) took a meta-analytic approach,  
419 conducting  $F_{ROH}$  analyses in each contributing sample separately, and then combining  
420 across samples, controlling for relevant covariates (e.g. dataset, country of data  
421 collection). Joshi et al. in particular analyzed a much more diverse overall sample than  
422 the present study, which included multiple cohorts from European, African, and Asian  
423 populations. Another difference is in the measurement of intelligence across studies: our  
424 measurement for general cognitive ability was the unweighted sum of the number of 13  
425 fluid intelligence questions answered correctly, given as part of the UK Biobank's  
426 cognitive function assessment, while Howrigan et al. (8) converted the scores from each  
427 contributing sample's measure of general cognitive ability (e.g. WAIS-R, Cattell Culture  
428 Fair Test) into z-scores (to avoid bias from different measurement schemes across  
429 samples), and Joshi et al. used  $g$  as their measure of general cognitive ability,  
430 "calculated as the first unrotated principal component of test scores across diverse  
431 domains of cognition". Finally, our regression models controlled for the first 20 ancestry  
432 principal components, while Howrigan et al. controlled for the first 10 and Joshi et al. the  
433 first 3.

434 Possible evolutionary interpretations

435           There are two major evolutionary theories for why inbreeding depression occurs  
436 (4): the overdominance hypothesis posits that an overall loss of heterozygosity at loci  
437 governed by heterozygote advantage leads to inbreeding depression, while the partial  
438 dominance theory postulates that inbreeding depression occurs as selection acts most  
439 efficiently on the most additive and dominant deleterious mutations, purging those from  
440 the population while leaving behind the more rare, partially recessive deleterious alleles.  
441 This second hypothesis, partial dominance, is widely accepted as the more likely  
442 mechanism of inbreeding depression (3,30). The robust associations we observed  
443 between  $F_{ROH}$  and AFS, FI, and FEV1, even after controlling for homozygosity at  
444 common variants with  $F_{SNP}$ , suggest that the variants contributing to lower trait values  
445 are biased toward being rare and recessive, consistent with predictions from a partial  
446 dominance model of inbreeding depression (5) and consistent with the hypothesis that  
447 these traits, or traits genetically correlated with them, have been under directional  
448 selection over evolutionary time. Cognitive ability, including intelligence test scores, is a  
449 predictor of multiple Darwinian fitness-related outcomes, including overall health and  
450 lifespan (8,31). FEV1 is correlated with mortality and lifespan (32–35), traits that are  
451 components of fitness and thus more likely to have been under directional selection over  
452 evolutionary history (36). Thus, our replication of the associations between autozygosity  
453 and FEV1 and FI adds to a body of evidence that these traits, or traits genetically  
454 correlated with them, have been under directional selection over evolutionary history,  
455 leading to deleterious variants that are biased toward being rarer and more recessive  
456 than otherwise expected.

457           The positive relationship we observed between AFS and  $F_{ROH}$  is a novel finding,  
458 to the best of our knowledge. The  $F_{ROH}$ -AFS association remained statistically significant  
459 after controlling for sociodemographic variables and homozygosity at common variants  
460 ( $F_{SNP}$ ). Although novel, the finding is consistent with a body of research suggesting that

461 reproductive traits, like AFS, in non-human populations are under more intense selection  
462 pressures than non-fitness traits (5,37)). If autozygosity causally influences AFS (see  
463 “Limitations” below), there are two possible evolutionary interpretations. First, it is  
464 possible that early sex itself was advantageous in ancient human history due to a  
465 prolonged reproductive period. A second possibility is that the observed association  
466 between autozygosity and AFS is due to selection on a genetically correlated trait, such  
467 as sexual attractiveness (38,39).

#### 468 Limitations

469       There were two central limitations in the current study. The most important one,  
470 which applies equally to all other  $F_{ROH}$  studies that we are aware of, is that ROH  
471 associations might be due to third-variable explanations. Unlike GWAS analyses, where  
472 parental or offspring sociodemographic traits are unlikely to be associated with allele  
473 frequencies and therefore are unlikely to bias GWAS results, it takes only a single  
474 generation of parental inbreeding to strongly influence  $F_{ROH}$  levels in offspring. For  
475 example, higher income might be associated with greater opportunities to meet mates of  
476 diverse origins and to higher outbreeding; offspring of higher income parents might  
477 thereby have not only lower levels of autozygosity, on average, but might also differ on  
478 any traits influenced genetically or environmentally by parental income. While  
479 sociodemographic confounding is particularly problematic in ascertained samples where  
480 cases and controls are drawn from different populations (e.g. cases drawn from a  
481 psychiatric hospital, controls from a nearby university), the possibility of confounding  
482 cannot be eliminated, even in population-based samples, unless relevant  
483 sociodemographic variables among parents are measured and controlled for or other  
484 (e.g., within-family) designs are used. For example, in a study of approximately 2,000  
485 individuals of Dutch ancestry, Abdellaoui et al.(40) found only a weak association  
486 between  $F_{ROH}$  and the subjects’ own educational attainment ( $p = 0.045$ ), but found highly

487 significant negative associations between the subject's  $F_{ROH}$  and their parents'  
488 educational attainment ( $p_{father} < 10^{-5}$ ,  $p_{mother} = 9e^{-5}$ ). These relationships were entirely  
489 mediated by the geographic distance between parents' birthplaces, such that parents  
490 with higher educational attainment tended to be more geographically mobile, increasing  
491 their chances of mating with someone genetically dissimilar from themselves and thus  
492 creating systematic differences in levels of inbreeding across levels of educational  
493 attainment in their offspring.

494         Having information on parents' birth location, education, income, mobility, level of  
495 religious involvement, and so forth is important in order to control for the possibility that  
496 these sociodemographic variables are associated with both higher levels of (distant)  
497 inbreeding and lower offspring trait values. Unfortunately, the UK Biobank has limited  
498 parental information other than indirect measures such as whether one was breastfed. In  
499 the current study, we used sociodemographic responses of the offspring as imperfect  
500 proxies for parental responses, which is effective only to the degree that offspring values  
501 on these sociodemographic variables are positively correlated with their parents' values.  
502 For example, parental educational ( $r = 0.25 - 0.40$ ; (41,42)), income ( $r = .60$ ; (42)), and  
503 religiosity (43) are imperfectly correlated between parents and offspring in Great Britain.  
504 These imperfect correlations imply that the true mediating influences of the  
505 sociodemographic variables on observed  $F_{ROH}$ -trait relationships were likely to be  
506 underestimated in the present report, and thus causal interpretation of our results may  
507 not be warranted.

508         The second limitation to the current study is that we did not have access to all of  
509 the phenotypes studied in recent articles such as Verweij et al. (9) or Joshi et al. (7) (e.g.  
510 the cholesterol measures in Joshi et al.), so we could not attempt to fully replicate these  
511 previous investigations.

512 Summary



513 We found several significant associations between estimated autozygosity and  
514 sociodemographic, anthropometric, health, and otherwise fitness-related traits, including  
515 whether or not a person attends a religious group as a leisure activity, AFS, grip  
516 strength, height, FI, and FEV1. All effects were in the direction that would be predicted  
517 by evolutionary hypotheses (i.e. higher inbreeding associated with lower fitness). When  
518 controlling for measures of background sociodemographic characteristics (educational  
519 attainment, college education, income, urbanicity, TDI, religious participation, and  
520 whether or not an individual was breastfed) – which should at least partially reflect  
521 parental characteristics – we found that two (height and grip strength) of the five  
522 significant  $F_{ROH}$ -trait associations were attenuated and became non-significant, while  
523 AFS, FI, and FEV1 remained significantly associated with  $F_{ROH}$ . The fact that the  
524 associations between estimated autozygosity and both grip strength and height were  
525 reduced after controlling for the additional covariates suggests that these relationships  
526 might not hold up if relevant confounder variables in parents had been controlled for, and  
527 we cannot eliminate the possibility that the other  $F_{ROH}$ -trait associations we report here  
528 would not also be attenuated or eliminated in this situation.

529 Nevertheless, our results are consistent with the hypothesis that natural selection  
530 has biased the alleles contributing to lower fluid intelligence, later age at first sex, and  
531 poorer lung functioning (as measured by FEV1) toward being rare and recessive. These  
532 findings generally replicate previous findings in humans (7–9), and are consistent with  
533 similar ones from non-human populations (37,44,45). This cumulative evidence may well  
534 reflect the detrimental effects of autozygosity on complex traits, revealing ancient  
535 selection pressures on these or correlated traits. However, the fact remains that even in  
536 very large, well-powered, unascertained samples such as this one, it is exceedingly  
537 difficult to make definitive statements about the underlying causal mechanism of  
538 observed relationships between  $F_{ROH}$  and complex traits.

539

## 540 **Acknowledgements**

541 We thank Chick Judd for his statistical guidance on testing mediation models, as well as  
542 Brooke Huibregtse for her valuable input regarding some of the UK Biobank phenotypes.  
543 This work was supported by R01 MH100141 (MCK). This research has been conducted  
544 using the UK Biobank Resource under Application Numbers '1665', '16651', and '24795'.

545

546 **Figure 1. Beta  $F_{ROH}$  and 95% confidence intervals from main regression models**  
547 **controlling for minimal covariates (20 ancestry principal components, genotype**  
548 **batch, per-sample SNP missingness, age, age<sup>2</sup>, and sex).** Significant estimates (at  $p$   
549  $< 0.002$  - corrected for multiple testing) are starred (religious group attendance as a  
550 leisure activity, age at first sexual intercourse, FEV1, FI, height, and grip strength). **A.** All  
551 quantitative traits were analyzed in intra-sex standardized phenotypic units in linear  
552 regression models. **B.** Binary traits and diagnoses were analyzed using logistic  
553 regression models (the log odds ratios are reported). BMI, body mass index; BMR, basal  
554 metabolic rate; BPD, bipolar disorder; MDD, major depression; CI, confidence interval;  
555 FI, fluid intelligence; FEV1, forced expiratory volume in 1 second; TDI, Townsend  
556 Deprivation Index.

557

558 **Figure 2. Comparison with estimates from Joshi et al. 2015, and some evidence**  
559 **that sociodemographic background variables attenuate the relationship between**  
560  **$F_{ROH}$  and complex traits.** Plot shows the Beta  $F_{ROH}$  and 95% confidence interval in  
561 within-sex standardized phenotypic units for the five quantitative traits that were  
562 significantly associated with  $F_{ROH}$  in the main models (Fig 1), as well as educational  
563 attainment, which was significantly associated with autozygosity in Joshi et al.'s study(7).  
564 Estimates that were statistically significant after multiple testing corrections are starred  
565 for each set of models. After controlling for background sociodemographic  
566 characteristics, age at first sexual intercourse, FEV1, and FI were still statistically  
567 significant in our study. The effect sizes for AFS, grip strength, FI, and height all  
568 decreased after controlling for sociodemographic variables. The effect sizes from our  
569 analyses were smaller for all four of the phenotypes also measured in Joshi et al.'s  
570 study. FI, fluid intelligence; FEV1, forced expiratory volume in 1 second; CI, confidence  
571 interval.

## 572 **Supporting Information Legends**

573 **S1\_Materials.docx** Additional information on phenotype derivation, mediation analysis  
574 and testing for indirect effect,  $F_{SNP}$  simulations, Supplementary Tables S1-S5, and  
575 Supplementary Figures S1-S2.

576

## 577 **References**

- 578 1. Darwin C. The effects of cross and self fertilisation in the vegetable kingdom. J.  
579 Murray; 1876.
- 580 2. Walsh B. Evolutionary Quantitative Genetics. In: Handbook of Statistical Genetics:  
581 Third Edition. 2008. p. 533–86.
- 582 3. Charlesworth D, Willis JH. The genetics of inbreeding depression. *Nat Rev Genet.*  
583 2009;10(11):783–96.
- 584 4. Sewall-Wright S. Evolution and the genetics of populations. Vol. 3: experimental  
585 results and evolutionary deductions. Chicago, IL: University of Chicago Press;  
586 1977.
- 587 5. Keller MC, Visscher PM, Goddard ME. Quantification of inbreeding due to distant  
588 ancestors and its detection using dense single nucleotide polymorphism data.  
589 *Genetics.* 2011;189(1):237–49.
- 590 6. Kirin M, McQuillan R, Franklin CS, Campbell H, Mckeigue PM, Wilson JF.  
591 Genomic runs of homozygosity record population history and consanguinity. *PLoS*  
592 *One.* 2010;5(11).
- 593 7. Joshi PK, Esko T, Mattsson H, Eklund N, Gandin I, Nutile T, et al. Directional  
594 dominance on stature and cognition in diverse human populations. *Nature.*  
595 2015;523(7561):459–62.
- 596 8. Howrigan DP, Simonson MA, Davies G, Harris SE, Tenesa A, Starr JM, et al.  
597 Genome-wide autozygosity is associated with lower general cognitive ability. *Mol*  
598 *Psychiatry.* 2015 Sep 22;
- 599 9. Verweij KJH, Abdellaoui A, Veijola J, Sebert S, Koiranen M, Keller MC, et al. The  
600 Association of Genotype-Based Inbreeding Coefficient with a Range of Physical  
601 and Psychological Human Traits. *PLoS One.* 2014 Jul 25;9(7):e103102.
- 602 10. Johnson EC, Bjelland DW, Howrigan DP, Abdellaoui A, Breen G, Borglum A, et al.  
603 No Reliable Association between Runs of Homozygosity and Schizophrenia in a  
604 Well-Powered Replication Study. *PLoS Genet.* 2016;12(10).
- 605 11. Power RA, Keller MC, Ripke S, Abdellaoui A, Wray NR, Sullivan PF, et al. A  
606 recessive genetic model and runs of homozygosity in major depressive disorder.  
607 *Am J Med Genet Part B Neuropsychiatr Genet.* 2014;165(2):157–66.
- 608 12. Rudan I, Smolej-Narancic N, Campbell H, Carothers A, Wright A, Janicijevic B, et  
609 al. Inbreeding and the genetic complexity of human hypertension. *Genetics.*  
610 2003;163(3):1011–21.
- 611 13. Campbell H, Carothers AD, Rudan I, Hayward C, Biloglav Z, Barac L, et al.  
612 Effects of genome-wide heterozygosity on a range of biomedically relevant human  
613 quantitative traits. *Hum Mol Genet.* 2007;16(2):233–41.
- 614 14. Abdellaoui A, Hottenga JJ, Xiao X, Scheet P, Ehli EA, Davies GE, et al.  
615 Association between autozygosity and major depression: Stratification due to  
616 religious assortment. *Behav Genet.* 2013;43(6):455–67.
- 617 15. Koenig HG. Research on religion, spirituality, and mental health: A review. *Can J*  
618 *Psychiatry.* 2009;54(5):283–91.

- 619 16. Vine AE, McQuillin A, Bass NJ, Pereira A, Kandaswamy R, Robinson M, et al. No  
620 evidence for excess runs of homozygosity in bipolar disorder. *Psychiatr Genet.*  
621 2009;19(4):165–70.
- 622 17. Heron EA, Cormican P, Donohoe G, O'Neill FA, Kendler KS, Riley BP, et al. No  
623 evidence that runs of homozygosity are associated with schizophrenia in an Irish  
624 genome-wide association dataset. *Schizophr Res.* 2014;154(1–3):79–82.
- 625 18. McQuillan R, Leutenegger AL, Abdel-Rahman R, Franklin CS, Pericic M, Barac-  
626 Lauc L, et al. Runs of Homozygosity in European Populations. *Am J Hum Genet.*  
627 2008;83(3):359–72.
- 628 19. Keller MC, Simonson MA, Ripke S, Neale BM, Gejman P V., Howrigan DP, et al.  
629 Runs of homozygosity implicate autozygosity as a schizophrenia risk factor. *PLoS*  
630 *Genet.* 2012;8(4).
- 631 20. Ruderfer DM, Lim ET, Genovese G, Moran JL, Hultman CM, Sullivan PF, et al. No  
632 evidence for rare recessive and compound heterozygous disruptive variants in  
633 schizophrenia. *Eur J Hum Genet.* 2014;23(July):1–3.
- 634 21. Bycroft C, Freeman C, Petkova D, Band G, Elliott LT, Sharp K, et al. Genome-  
635 wide genetic data on ~500,000 UK Biobank participants. *bioRxiv.* 2017 Jan 1;
- 636 22. Okbay A, Beauchamp JP, Fontana MA, Lee JJ, Pers TH, Rietveld CA, et al.  
637 Genome-wide association study identifies 74 loci associated with educational  
638 attainment. *Nature.* 2016;533(7604):539–42.
- 639 23. Yang J, Lee SH, Goddard ME, Visscher PM. GCTA: A tool for genome-wide  
640 complex trait analysis. *Am J Hum Genet.* 2011;88(1):76–82.
- 641 24. Chang CC, Chow CC, Tellier LC, Vattikuti S, Purcell SM, Lee JJ. Second-  
642 generation PLINK: rising to the challenge of larger and richer datasets.  
643 *Gigascience.* 2015;4(1):7.
- 644 25. Gudnadottir M, Sigurdur Gunnarsson B, Thorsdottir I. Effects of sociodemographic  
645 factors on adherence to breastfeeding and other important infant dietary  
646 recommendations. *Acta Pædiatrica.* 2006 Apr;95(4):419–24.
- 647 26. Judd CM, Kenny DA. Process analysis: Estimating mediation in treatment  
648 evaluations. *Eval Rev.* 1981;5(5):602–19.
- 649 27. Fisher RA. A fuller theory of “Junctions” in inbreeding. *Heredity (Edinb).*  
650 1954;8(2):187–97.
- 651 28. Afzal M. Consequences of consanguinity on cognitive behavior. *Behav Genet.*  
652 1988;18(5):583–94.
- 653 29. McQuillan R, Eklund N, Pirastu N, Kuningas M, McEvoy BP, Esko T, et al.  
654 Evidence of inbreeding depression on human height. *PLoS Genet.* 2012;8(7).
- 655 30. Charlesworth B, Charlesworth D. The genetic basis of inbreeding depression.  
656 *Genet Res.* 1999;74(3):329–40.
- 657 31. Gottfredson LS, Deary IJ. Intelligence Predicts Health and Longevity, but Why?  
658 *Curr Dir Psychol Sci.* 2004;13(1):1–4.
- 659 32. Stavem K, Aaser E, Sandvik L, Bjørnholt J V., Erikssen G, Thaulow E, et al. Lung  
660 function, smoking and mortality in a 26-year follow-up of healthy middle-aged  
661 males. *Eur Respir J.* 2005;25(4):618–25.
- 662 33. Beaty TH, Cohen BH, Newill CA, Menkers HA, Diamond EL, Chen CJ. Impaired

- 663 pulmonary function as a risk factor for mortality. *Am J Epidemiol.*  
664 1982;116(1):102–13.
- 665 34. Hole DJ, Watt GCM, Davey-Smith G, Hart CL, Gillis CR, Hawthorne VM. Impaired  
666 lung function and mortality risk in men and women: findings from the Renfrew and  
667 Paisley prospective population study. *BMJ.* 1996;313(7059):711–5.
- 668 35. Higgins MW, Keller JB. Predictors of mortality in the adult population of  
669 Tecumseh: respiratory symptoms, chronic respiratory disease, and ventilatory  
670 lung function. *Arch Environ Heal An Int J.* 1970;21(3):418–24.
- 671 36. Keller MC. Evolutionary Perspectives on Genetic and Environmental Risk Factors  
672 for Psychiatric Disorders. *Annu Rev Clin Psychol.* 2018;(0).
- 673 37. DeRose MA, Roff DA. A Comparison of Inbreeding Depression in Life-History and  
674 Morphological Traits in Animals. *Evolution (N Y).* 1999;53(4):1288.
- 675 38. Rhodes G, Simmons LW, Peters M. Attractiveness and sexual behavior: Does  
676 attractiveness enhance mating success? *Evol Hum Behav.* 2018 Feb  
677 5;26(2):186–201.
- 678 39. Weeden J, Sabini J. Subjective and objective measures of attractiveness and their  
679 relation to sexual behavior and sexual attitudes in university students. *Arch Sex  
680 Behav.* 2007;36(1):79–88.
- 681 40. Abdellaoui A, Hottenga JJ, Willemsen G, Bartels M, Van Beijsterveldt T, Ehli EA,  
682 et al. Educational attainment influences levels of homozygosity through migration  
683 and assortative mating. *PLoS One.* 2015;10(3).
- 684 41. Dubow EF, Boxer P, Huesmann LR. Long-term Effects of Parents' Education on  
685 Children's Educational and Occupational Success: Mediation by Family  
686 Interactions, Child Aggression, and Teenage Aspirations. *Merrill Palmer Q*  
687 (Wayne State Univ Press). 2009 Jul;55(3):224–49.
- 688 42. Dearden L, Machin S, Reed H. Intergenerational mobility in Britain. *Econ J.*  
689 1997;107(440):47–66.
- 690 43. Voas D, Crockett A. Religion in Britain: Neither Believing nor Belonging.  
691 *Sociology.* 2005 Feb 1;39(1):11–28.
- 692 44. Bjelland DW, Weigel KA, Vukasinovic N, Nkrumah JD. Evaluation of inbreeding  
693 depression in Holstein cattle using whole-genome SNP markers and alternative  
694 measures of genomic inbreeding. *J Dairy Sci.* 2013;96(7):4697–706.
- 695 45. Howard JT, Pryce JE, Baes C, Maltecca C. Invited review: Inbreeding in the  
696 genomics era: Inbreeding, inbreeding depression, and management of genomic  
697 variability. *J Dairy Sci.* 2017;
- 698

$\beta$  Froh (+/- 95% CIs)

**A.**

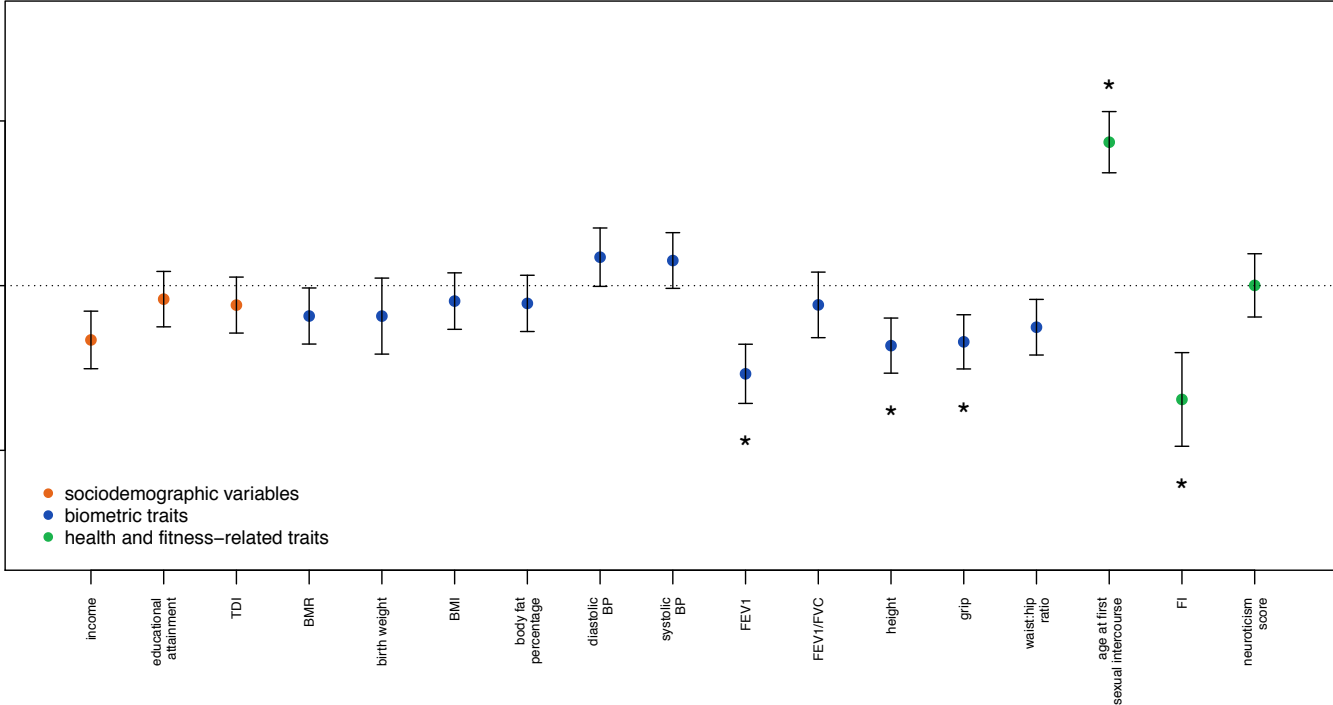

**B.**

Log Odds Ratios (+/- 95% CIs)

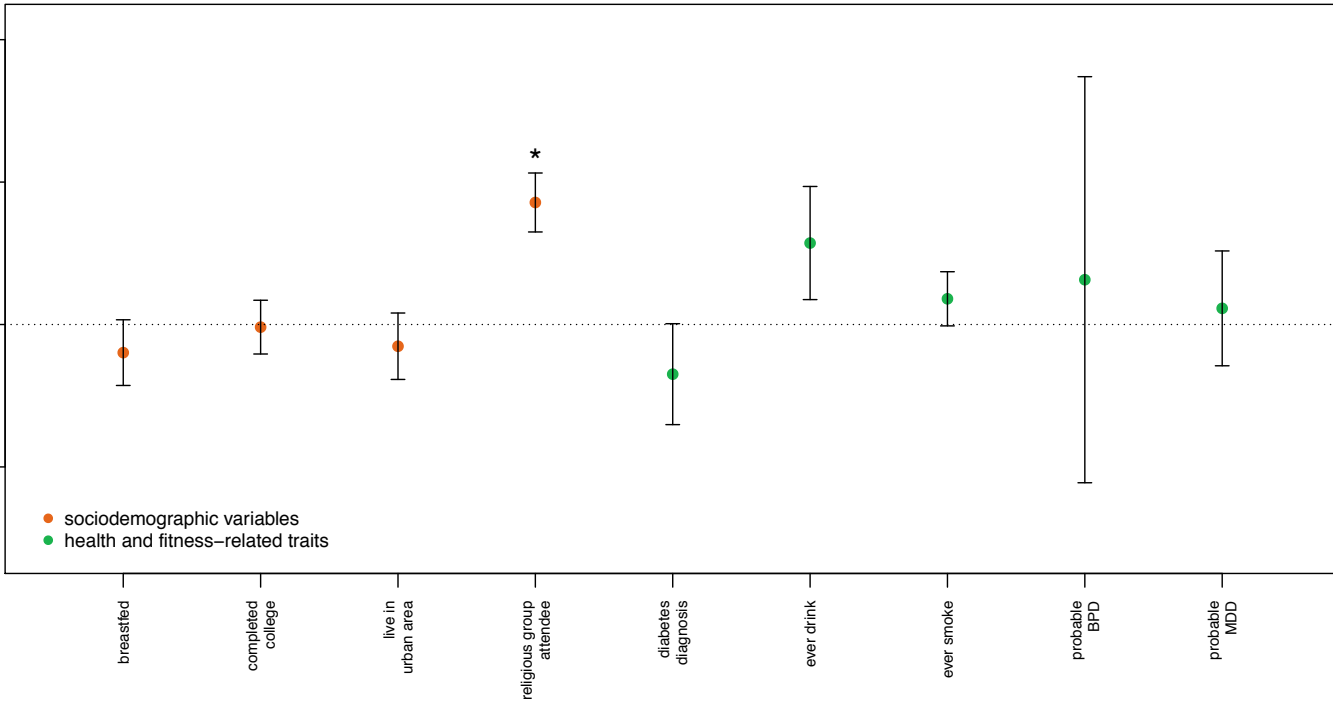

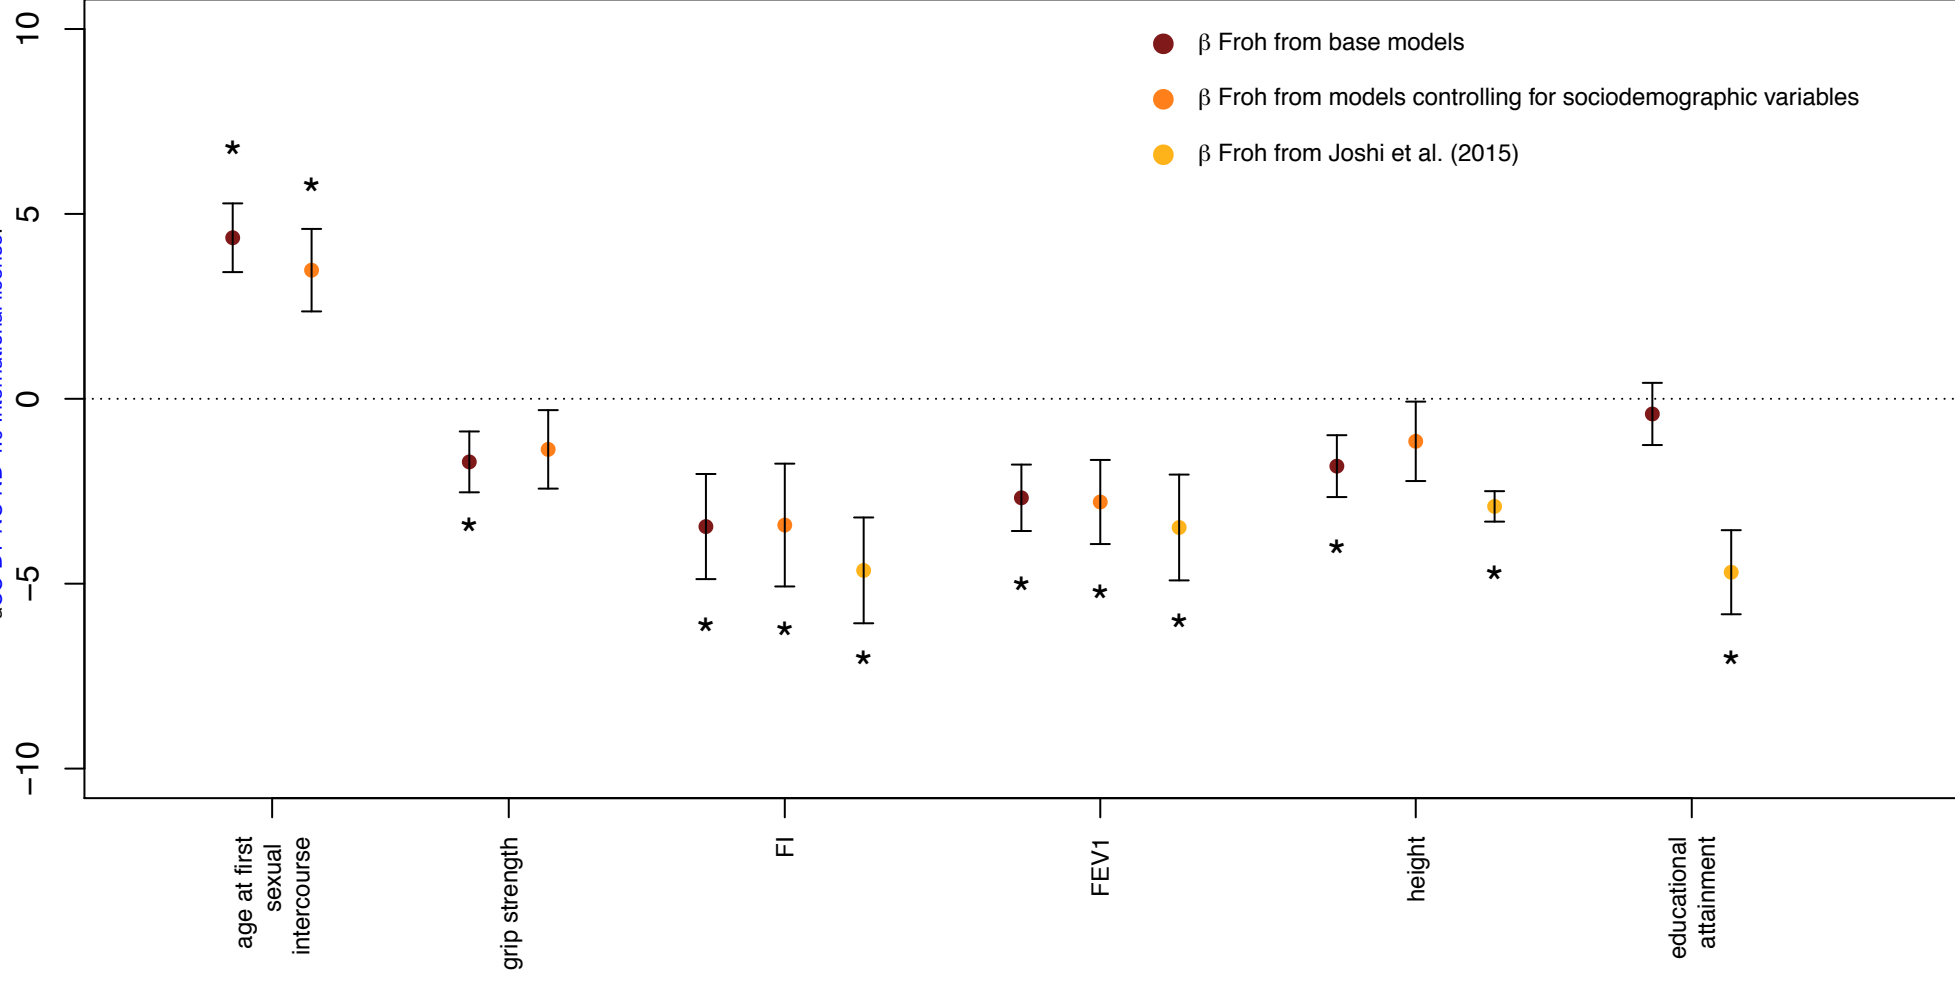

Source: https://www.biorxiv.org/content/10.1101/291872v1.full.pdf
